# Supplementary material for: Role of RNAIII in Resistance to Antibiotics and Antimicrobial Agents in Staphylococcus epidermidis Biofilms
Source: MDPI journal article supplement (doi:10.3390/ijms231911094), 2022-09-21
Supplement: s1 [file s1]

## PCR amplification of allelic exchange cassette

**Table S1.** Primers used in this work.

| Primer name     | Sequence                                                                      | Length  | Reference |
|-----------------|-------------------------------------------------------------------------------|---------|-----------|
| rt_aap_F        | TGAGGCCGTACCAACAGTG                                                           | 103 bp  | This work |
| rt_aap_R        | ATGGGCAAACGTAGACAAGGT                                                         |         |           |
| rt_ica_F        | TGATCCTACGCACATCGCTT                                                          | 94 bp   | This work |
| rt_ica_R        | CGAACCACGTGCTCTATGCT                                                          |         |           |
| agrA_F          | GTTTGTGAAGATGACCAAAGAC<br>A                                                   | 104 bp  | This work |
| agrA_R          | AGGATCATTTGTTGCTAAAGC                                                         |         |           |
| agrD_F          | CACTACAATCTTGAATTTATTG<br>G                                                   | 89 bp   | This work |
| agrD_R          | TCTGGTACTTCTGGTTCGTCAA                                                        |         |           |
| PSM $\beta$ 1_F | AGCAGCCATCACTAACG                                                             | 90 bp   | This work |
| PSM $\beta$ 1_R | CCCAAAAATCGATTACCATAT<br>C                                                    |         |           |
| PSM $\beta$ 2_F | GATGCAGGAATCAACCAAGATT<br>G                                                   | 93 bp   | This work |
| PSM $\beta$ 2_R | GACCTAATAATTTAGAAATAAC<br>ACTAATACC                                           |         |           |
| DEL1-F          | GGCCGCGGCCGCCAAGAATATT<br>TTTATTTTAATTATTACTTGATA<br>ATTAAATGTAAGCTA          | 1002 bp | This work |
| DEL1-R          | CAGTTAATAAATTCAAAAAATA<br>ATTTTAACTATGCTATTTATAAA<br>GATGTGGTTTTAGATTTC       |         |           |
| DEL2-F          | CATCTTTATAAATAGCATAGTTA<br>AAATTATTTTTTGAATTTATTAA<br>CTGTATCGATAATCCATTTTACT | 1120 bp | This work |
| DEL2-R          | GGCCGAATTCCTCTAGGGTTATA<br>TTTACTCGTATAGTTTATGTCAG                            |         |           |

To assemble both fragments to functional allelic exchange cassette, fragments were assembled together with outer primers. In this case fragment DEL1-F and DEL2-R were fused. Cleavage sites on primers are underlined.

**Table S2.** Combinations of primers used for amplification of fragments and deletion cassette with appropriate lengths of fragments.

| Primer name   | Fragment name                        | Product length |
|---------------|--------------------------------------|----------------|
| DEL1-F/DEL1-R | Fragment 1                           | 1002 bp        |
| DEL2-F/DEL2-R | Fragment 2                           | 1120 bp        |
| DEL1-F/DEL2-R | Functional allelic exchange cassette | 2115 bp        |

### Construction of plasmid pIMAY-delRNAIII

Both, plasmid pIMAY and functional cassette as PCR product were digested by restriction enzymes NotI and EcoRI (New England Biolabs) in a 50  $\mu$ L reaction. CutSmart buffer was used for restriction and reaction was incubated at 37 °C for 1 h. Digested vector was dephosphorylated with alkaline phosphatase (rSAP, New England Biolabs) for 30 min at 37 °C. Dephosphorylation reaction was deactivated at 65 °C for 10 min. Both, vector and insert were purified by Wizard®SV Gel and PCR clean-up system (Promega). For ligation, the volume of digested vector and insert were determined based on concentration after digestion. Ligation was performed in 20  $\mu$ L reaction containing T4 DNA ligase (New England Biolabs) and T4 DNA ligase buffer (supplied by manufacturer) for 1 h at laboratory temperature. 5  $\mu$ L of ligation mixture was transformed to *E. coli* strain E. cloni 10G (Merck) and positive clones were selected on chloramphenicol (stock solution 10 mg/ mL).

### Transformation of *E. coli* Ec\_SERP62aI to overcome *S. epidermidis* RM systems

To overcome both RM systems of *S. epidermidis* and increase of transformation efficiency in staphylococci, prepared construct was transformed to *E. coli* strain Ec\_SERP62aI for proper methylation (Lee et al., 2019 [45]).

To 50  $\mu$ L of chemocompetent *E. coli* cells, we added 1  $\mu$ g of plasmid DNA pIMAY-delRNAIII. Competent cells together with the plasmid DNA were incubated on ice for 10 min. Subsequently, we exposed the cells to a heat shock of 42 °C for 45 sec. After heat shock, the cells were incubated again on ice for 2 min. 0.5 ml of liquid LB medium was added to the cells, mixed, transferred to a microtube and incubated with shaking at 37 °C for 1 hour. The cells were then plated on Petri dishes containing LB medium with 10  $\mu$ g/ mL chloramphenicol and incubated at 37 °C overnight. Selected colonies were verified for plasmid DNA.

### Electroporation of *S. epidermidis* and allelic exchange

Electroporation was conducted essentially as described by Löfblom et al. (2007) [1] and allelic exchange as described by Monk et al. (2012) [22].

### Verification of presence of *agr* locus genes

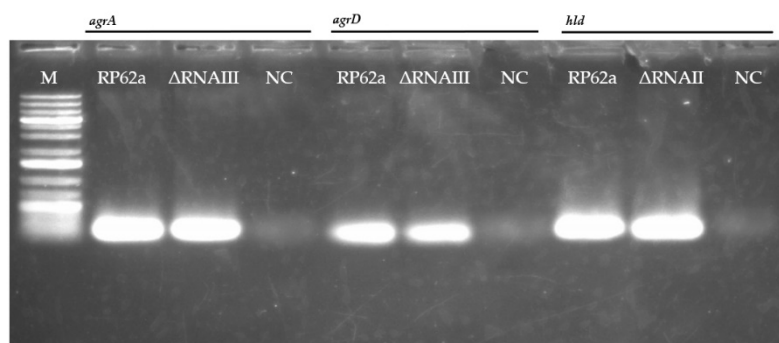

**Figure S1.:** Verification of presence of *agr* locus genes. Three genes *agrA*, *agrD* and *hld* were verified by PCR using primers used in Real Time qPCR (Table 1) (NC – negative control).

## Reference

1. Löfblom J., Kronqvist N., Uhlén M., Ståhl S., Wernérus H. Optimization of electroporation-mediated transformation: *Staphylococcus carnosus* as model organism. *J Appl Microbiol.* **2007**, Mar; 102(3): 736-747. doi: 10.1111/j.1365-2672.2006.03127.x.
