# Supplementary material for: Role of RNAIII in Resistance to Antibiotics and Antimicrobial Agents in Staphylococcus epidermidis Biofilms
Source: MDPI journal article supplement (doi:10.3390/ijms231911094), 2022-09-21
Supplement: s1 [file s1]

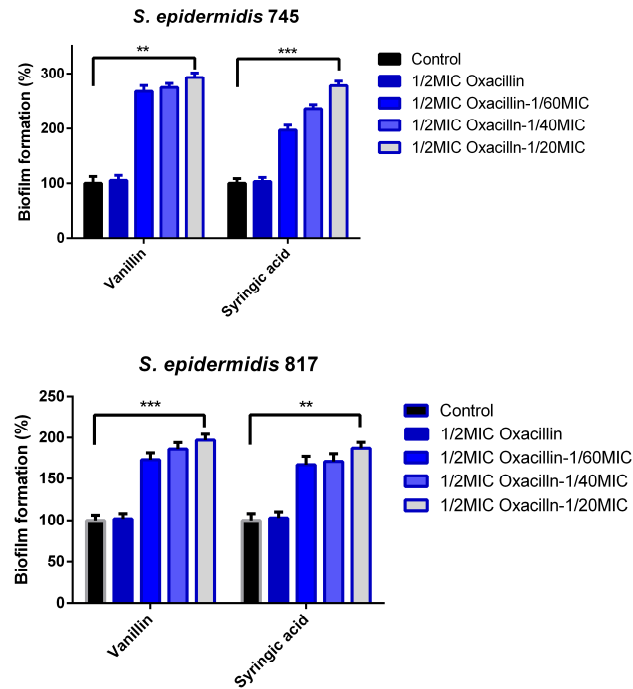

Figure S1: Effect of vanillin and syringic acid in combination with oxacillin on biofilm formation on *S. epidermidis* 745 and 817 (\*\*  $p < 0.01$ , \*\*\*  $p < 0.001$ ).

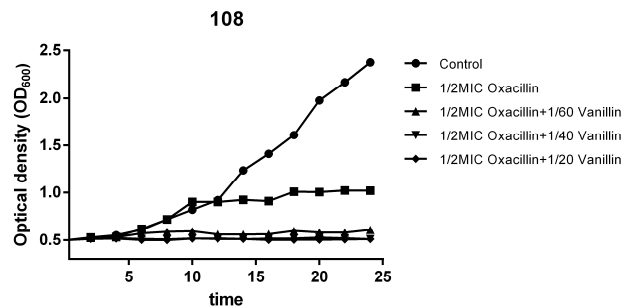

Figure S2: Analysis of the effect of Oxacillin in combination with vanillin on the growth of methicillin susceptible clinical strain *S. epidermidis* 108.
